# Supplementary material for: Frailty recommendations and guidelines: an evaluation of the implementability and a critical appraisal of clinical applicability by the ISPRM Frailty Focus Group
Source: PubMed Central journal article supplement — Eur J Phys Rehabil Med. 2024 Apr 24;60(3):530–9. doi: 10.23736/S1973-9087.24.08486-7 (PMC11258911; doi:10.23736/s1973-9087.24.08486-7), 2024-04-24
Supplement: Supplementary_Digital_Material1.pdf [file Supplementary_Digital_Material1.pdf]

SUPPLEMENTARY DIGITAL MATERIAL 1

Supplementary Table I.—Description of the guidelines retrieved through the literature search and evaluated by the working group.<sup>14-23</sup>

| First author, (citation)                | Name of the guideline                                                                         | Institution promoting the guideline                         | Most represented field of study of guidelines developers | Methodology                                                                                               | Scope of the guideline                                                                                                                                      | Target audience                                                                                                                                                           |
|-----------------------------------------|-----------------------------------------------------------------------------------------------|-------------------------------------------------------------|----------------------------------------------------------|-----------------------------------------------------------------------------------------------------------|-------------------------------------------------------------------------------------------------------------------------------------------------------------|---------------------------------------------------------------------------------------------------------------------------------------------------------------------------|
| British Geriatric Society <sup>16</sup> | Fit for Frailty                                                                               | British Geriatric Society                                   | Geriatrics                                               | Not stated                                                                                                | To provide consensus best practice guidance for the management of frailty in community and outpatient settings                                              | Health and social care professionals in the community, in outpatient clinics, in community hospitals and other intermediate care settings and in older people's own homes |
| Dent <sup>14</sup>                      | The Asia-Pacific Clinical Practice Guidelines for the Management of Frailty                   | n/a                                                         | Geriatrics                                               | Modified Delphi process followed by development of recommendations formulated using the GRADE terminology | Provide evidence-based, multidisciplinary guidelines for the identification and management of frailty                                                       | Health practitioners in the Asia-Pacific region                                                                                                                           |
| Dent <sup>15</sup>                      | ICFSR International Clinical Practice Guidelines for Identification and Management of Frailty | International Conference of Frailty and Sarcopenia Research | Geriatrics                                               | GRADE methodology                                                                                         | Providing evidence-based recommendations for the identification and management of frailty in older adults, while considering lifestyle factors and clinical | All health professionals who contribute to the care of older people with frailty, including clinicians and allied health                                                  |

|                                                    |                            |                                                                                                                                     |                            |                                                                                                                                    |                                                                                                            |                                                                                                                                                                                                                         |
|----------------------------------------------------|----------------------------|-------------------------------------------------------------------------------------------------------------------------------------|----------------------------|------------------------------------------------------------------------------------------------------------------------------------|------------------------------------------------------------------------------------------------------------|-------------------------------------------------------------------------------------------------------------------------------------------------------------------------------------------------------------------------|
| Health Quality and Safety Commission <sup>20</sup> | Frailty care guides        | Health Quality and Safety Commission New Zealand                                                                                    | Nursing                    | Not stated                                                                                                                         | and practical aspects of care<br>Provide clinical information and practical advice to healthcare providers | professionals<br>Health professionals working in settings where people at risk of frailty receive care, including aged residential care, primary health care, community care, hospice and acute hospitals<br>Not stated |
| Kuzuya <sup>18</sup>                               | Clinical Guide for Frailty | The Japanese Association on Sarcopenia and Frailty, The Japan Geriatrics Society and National Center for Geriatrics and Gerontology | Geriatrics                 | Not stated                                                                                                                         | To consolidate the available data on frailty and to provide a guide for frailty-related issues             | Not stated                                                                                                                                                                                                              |
| Marcucci <sup>22</sup>                             | FOCUS guidelines           | Frailty Management Optimization through EIP-AHA Commitments and Utilisation of Stakeholder Input (FOCUS)                            | Health and social sciences | Systematic review, use of results from qualitative and quantitative studies within the FOCUS project, creation of GRADE Summary of | To provide evidence- and consensus-based guidelines for the prevention, delay and management of frailty    | All professionals involved in decision-making and implementation of actions on frailty                                                                                                                                  |

|                                                      |                                                                                                            |                                                                                              |                   |                                                   |                                                                                                                                                   |                                                                                                                                                |
|------------------------------------------------------|------------------------------------------------------------------------------------------------------------|----------------------------------------------------------------------------------------------|-------------------|---------------------------------------------------|---------------------------------------------------------------------------------------------------------------------------------------------------|------------------------------------------------------------------------------------------------------------------------------------------------|
| Ministry of Health of British Columbia <sup>21</sup> | Frailty in Older Adults - Early Identification and Management                                              | Ministry of Health of British Columbia                                                       | Family medicine   | Findings tables, consensus process.<br>Not stated | Provide recommendations for the early identification and management of older adults with frailty or vulnerable to frailty.                        | Professionals working in community-based primary care                                                                                          |
| Regional Health Council of Tuscany <sup>17</sup>     | Frailty in elderly people                                                                                  | Regional Health Council of Tuscany                                                           | Geriatrics        | Not stated                                        | To provide tools to identify frail subjects, to provide indications on possible interventions to prevent disability in non-disabled older adults. | Managers of health agencies and local authorities, nurses, clinicians, social workers, physiotherapists, occupational therapists<br>Not stated |
| Roller-Wirnsberger <sup>19</sup>                     | European Collaborative and Interprofessional Capability Framework for Prevention and Management of Frailty | Joint Action for Frailty Prevention (ADVANTAGE), European Geriatric Medicine Society (EuGMS) | Geriatrics        | Delphi process                                    | To develop of a collaborative and multi-professional capability framework for prevention and management of frailty using a Delphi process         | Not stated                                                                                                                                     |
| World Health Organization <sup>23</sup>              | WHO Guidelines on Integrated Care for Older People                                                         | World Health Organization (WHO)                                                              | Multidisciplinary | GRADE methodology                                 | To provide evidence-based guidance to health care providers on the appropriate approaches at the community level to detect and manage             | Primary target audiences: health care providers working in communities and in primary and secondary health                                     |

---

important declines in physical and mental capacities, and to deliver interventions in support of caregivers

care settings, professionals responsible for developing training curricula in medicine, nursing and public health. Other target audiences: health care managers, entities funding and implementing public health programmes, and nongovernmental organizations and charities active in the care of older people in the community setting.

---
