# Supplementary material for: Frailty recommendations and guidelines: an evaluation of the implementability and a critical appraisal of clinical applicability by the ISPRM Frailty Focus Group
Source: PubMed Central journal article supplement — Eur J Phys Rehabil Med. 2024 Apr 24;60(3):530–9. doi: 10.23736/S1973-9087.24.08486-7 (PMC11258911; doi:10.23736/s1973-9087.24.08486-7), 2024-04-24
Supplement: Supplementary_Digital_Material2.pdf [file Supplementary_Digital_Material2.pdf]

SUPPLEMENTARY DIGITAL MATERIAL 2

Supplementary Table II.—Quantitative results of the critical appraisal process of the included guidelines.

| Guideline                                                                               | AGREE II          |                         |                       |                         |               |                        | AGREE-REX          |                        |                        |                  |
|-----------------------------------------------------------------------------------------|-------------------|-------------------------|-----------------------|-------------------------|---------------|------------------------|--------------------|------------------------|------------------------|------------------|
|                                                                                         | Scope and purpose | Stakeholder involvement | Rigour of development | Clarity of presentation | Applicability | Editorial independence | Overall assessment | Clinical applicability | Values and preferences | Implementability |
| Fit for Frailty                                                                         | 78%               | 33%                     | 6%                    | 67%                     | 13%           | 25%                    | 2                  | 22%                    | 13%                    | 25%              |
| The Asia-Pacific Clinical Practice Guidelines for the Management of Frailty ICFSR       | 61%               | 44%                     | 44%                   | 83%                     | 50%           | 17%                    | 5                  | 56%                    | 38%                    | 50%              |
| International Clinical Practice Guidelines for Identification and Management of Frailty | 94%               | 61%                     | 69%                   | 94%                     | 50%           | 100%                   | 6                  | 72%                    | 46%                    | 58%              |
| Frailty care guides                                                                     | 67%               | 33%                     | 4%                    | 61%                     | 17%           | 0%                     | 2                  | 17%                    | 17%                    | 0%               |
| Clinical Guide for Frailty                                                              | 50%               | 17%                     | 21%                   | 50%                     | 0%            | 100%                   | 3                  | 11%                    | 0%                     | 0%               |
| FOCUS guidelines                                                                        | 94%               | 94%                     | 75%                   | 83%                     | 58%           | 58%                    | 6                  | 94%                    | 92%                    | 92%              |
| Frailty in Older Adults - Early Identification and Management                           | 72%               | 28%                     | 38%                   | 78%                     | 33%           | 67%                    | 4                  | 56%                    | 38%                    | 75%              |
| Frailty in elderly people                                                               | 72%               | 44%                     | 15%                   | 72%                     | 21%           | 58%                    | 4                  | 44%                    | 25%                    | 75%              |

|                                                                                                            |     |     |     |      |     |      |   |     |     |     |
|------------------------------------------------------------------------------------------------------------|-----|-----|-----|------|-----|------|---|-----|-----|-----|
| European Collaborative and Interprofessional Capability Framework for Prevention and Management of Frailty | 33% | 50% | 44% | 44%  | 0%  | 75%  | 4 | 61% | 42% | 67% |
| WHO Guidelines on Integrated Care for Older People                                                         | 89% | 83% | 81% | 100% | 83% | 100% | 6 | 89% | 79% | 83% |

---
