# Supplementary material for: Frailty recommendations and guidelines: an evaluation of the implementability and a critical appraisal of clinical applicability by the ISPRM Frailty Focus Group
Source: PubMed Central journal article supplement — Eur J Phys Rehabil Med. 2024 Apr 24;60(3):530–9. doi: 10.23736/S1973-9087.24.08486-7 (PMC11258911; doi:10.23736/s1973-9087.24.08486-7), 2024-04-24
Supplement: Supplementary_Digital_Material4.pdf [file Supplementary_Digital_Material4.pdf]

SUPPLEMENTARY DIGITAL MATERIAL 4

Supplementary Table IV.—Comments by the external reviewers regarding the topics covered by the endorsed recommendations.

| Topic                       | Colombia                                                                                                                       | Brasil                                                                                                                                                    | South Korea                                                                                                                                      | Italy                                                                                       | Japan                                                                                                                                                                                                                   | Russia                                                                                                                                  | Australia                                   | Spain | Tunisia                                                                          |
|-----------------------------|--------------------------------------------------------------------------------------------------------------------------------|-----------------------------------------------------------------------------------------------------------------------------------------------------------|--------------------------------------------------------------------------------------------------------------------------------------------------|---------------------------------------------------------------------------------------------|-------------------------------------------------------------------------------------------------------------------------------------------------------------------------------------------------------------------------|-----------------------------------------------------------------------------------------------------------------------------------------|---------------------------------------------|-------|----------------------------------------------------------------------------------|
| <b>Planning of the care</b> | Trained professionals are present<br>Not enough programs especially in rural areas<br>Need to train primary care professionals | Not enough trained professionals.<br>Few patients have access to free health services specific for frailty issues.<br>Need to screen for hearing problems | Applicability of multidisciplinary interventions in multiple areas is low dependent on logistic system of health care and workforce availability | Need to establish accessible and specific diagnostic and rehabilitation routes for patients | All the healthcare professionals who are involved in care planning should understand the comprehensive geriatric assessment along with frailty (including oral frailty) and sarcopenia measures and social prescription | These recommendations will fully help frail patients, improve their status of physical functioning, prevent the progression of frailty. | Reasonable to have guidelines on this topic | N\A   | WHO should encourage the development of geriatric services in healthcare systems |
| <b>Screening</b>            | Need to train primary                                                                                                          | Lack of resources and specific                                                                                                                            | Screening for frailty should be                                                                                                                  | All the components of frailty                                                               | Each country or region                                                                                                                                                                                                  | Specialist consultations help                                                                                                           | Limited evidence on the                     | N\A   | Need to translate the                                                            |

|                                   |                    |          |                                                                                                           |                                                                                                                                           |                                                                                                                                                                  |                                                                                                |                                                                           |                                                                                |                                                                               |
|-----------------------------------|--------------------|----------|-----------------------------------------------------------------------------------------------------------|-------------------------------------------------------------------------------------------------------------------------------------------|------------------------------------------------------------------------------------------------------------------------------------------------------------------|------------------------------------------------------------------------------------------------|---------------------------------------------------------------------------|--------------------------------------------------------------------------------|-------------------------------------------------------------------------------|
|                                   | care professionals | training | offered to all older adult, but need to define what is a simple and validated tool for routine screening. | should be screened Important but neglected for its cost to screen for cognitive impairment, social condition, visual and hearing problems | should develop specific screening paths. Development of mobile apps might help                                                                                   | prevent falls and fractures in frail patients                                                  | importance of screening if it is not tied to evidence-based interventions | available screening tools                                                      |                                                                               |
| <b>Pharmacological management</b> | N/a                | n/a      | N/A                                                                                                       | Avoid polypharmacy if crucial                                                                                                             | Limited evidence for pharmacological interventions. Chinese herbs would be promising. Additionally, regenerative medicine could be another option in the future, | Pharmacological methods have not been shown to be effective in the treatment of frail patients | This limited evidence in this area.                                       | Limited evidence, of the effectiveness of pharmacological treatment of frailty | Having multiple physicians can result in uncoordinated care and polypharmacy. |

|                                   |     |                                                                                                                                                                                          |                                                                     |                                                            |                                                                                                                      |                                                                                     |                                                                                                                                                               |                                                                                                                                                                                                                                                                                                                                                                           |                                                         |
|-----------------------------------|-----|------------------------------------------------------------------------------------------------------------------------------------------------------------------------------------------|---------------------------------------------------------------------|------------------------------------------------------------|----------------------------------------------------------------------------------------------------------------------|-------------------------------------------------------------------------------------|---------------------------------------------------------------------------------------------------------------------------------------------------------------|---------------------------------------------------------------------------------------------------------------------------------------------------------------------------------------------------------------------------------------------------------------------------------------------------------------------------------------------------------------------------|---------------------------------------------------------|
| <b>Nutrition\ supplementation</b> | N/a | Lack of resources and specific training<br>Need to investigate the conditions hindering nutrition<br>Communicate to the community the need to prevent frailty with appropriate nutrition | Need to focus on nutritional management rather than supplementation | Important to screen for vitamin D deficiency and hydration | although the problem is the cost.<br>Need to raise awareness about this topic among primary healthcare professionals | An integrated approach is most effective for treating frail and pre-frail patients. | There should be greater distinction between supplementation and assisting older people to increase protein / caloric intake via food rather than supplements. | There is few evidence about the effectiveness of nutritional supplementations in the prevention or treatment of frailty. However there is some increasing evidence about the benefits of some kind of diets (mainly, the Mediterranean diet) in the prevention of frailty. Finally, the benefits of nutritional interventions are maximized when concerging with physical | This approach should be strengthened in poor countries. |
|-----------------------------------|-----|------------------------------------------------------------------------------------------------------------------------------------------------------------------------------------------|---------------------------------------------------------------------|------------------------------------------------------------|----------------------------------------------------------------------------------------------------------------------|-------------------------------------------------------------------------------------|---------------------------------------------------------------------------------------------------------------------------------------------------------------|---------------------------------------------------------------------------------------------------------------------------------------------------------------------------------------------------------------------------------------------------------------------------------------------------------------------------------------------------------------------------|---------------------------------------------------------|

|                              |     |                                                                                                                                                            |     |                                                                                                                                                                                                                                                                      |                                                                                  |                                                                                                                             |                                                                                   |                                                 |                                |
|------------------------------|-----|------------------------------------------------------------------------------------------------------------------------------------------------------------|-----|----------------------------------------------------------------------------------------------------------------------------------------------------------------------------------------------------------------------------------------------------------------------|----------------------------------------------------------------------------------|-----------------------------------------------------------------------------------------------------------------------------|-----------------------------------------------------------------------------------|-------------------------------------------------|--------------------------------|
| <b>Exercise</b>              | N\A | Importance of assessment guided by objective parameters. Remotely supervised exercise programs might be viable. Patients should be aware of risk for falls | N\A | In the elderly aerobic exercises showed the greatest benefits, particularly the walk about five kilometers at a brisk pace, this type of exercise encourages contact with the environment, it is recommended that healthy and away from city smog, and costs are low | Need to raise awareness about this topic among primary health care professionals | It is necessary to select an individual training plan for frail patients, the volume and components of the training complex | Exercise is the most important category of intervention and should be highlighted | exercise programs.<br>N\A                       | N\A                            |
| <b>Cognitive stimulation</b> | N\A | This item is extremely relevant, but its                                                                                                                   | N\A | Even in the event that specific structures                                                                                                                                                                                                                           | The quality of evidence is still low and more                                    | Early intervention on pre-frail patients will                                                                               | N\A                                                                               | No data supporting the benefit of interventions | There are a few studies on the |

applicability depends on well trained teams and effective multidisciplinary work

are not available to carry out the rehabilitation process, it is always useful to recommend cognitive rehabilitation in a home environment by training family members and the caregiver. It is important that it is included among the recommendations to emphasize its effectiveness

intervention trials should be conducted. Additionally, unification of methodologies would be a challenge.

help to increase their rehabilitation potential and prevent progression to frailty.

on cognition in the prevention/treatment of frailty

prevalence of dementia and cognitive impairment in African countries. A gap requiring urgent attention in this region.

**Psychological and cognitive management**

N/a

In case there are multiple caregivers, or when

These interventions have not been sufficiently

Depression and dementia are linked and both

The quality of evidence is still low and more intervention

Therapy of cognitive disorders, emotional disorders

No data supporting the benefit of interventions on cognition in

N/A

|                             |     |                                                                                                                                                                                              |                                                                                                            |                                                   |                                                                                                             |                                                       |                                     |     |
|-----------------------------|-----|----------------------------------------------------------------------------------------------------------------------------------------------------------------------------------------------|------------------------------------------------------------------------------------------------------------|---------------------------------------------------|-------------------------------------------------------------------------------------------------------------|-------------------------------------------------------|-------------------------------------|-----|
|                             |     | there is considerable turnover, orientation is more difficult, as well as adherence. It is essential for the elderly who have greater functional limitations or dementia-related conditions. | demonstrated to be effective with respect to the aim of preventing or delaying the progression of frailty. | underdiagnosed<br>Need to take care of the family | trials should be conducted. Additionally, unification of methodologies would be a challenge.                | requires an integrated approach to be more effective. | the prevention/treatment of frailty |     |
| <b>Occupational therapy</b> | N/a | Resources availability are a challenge. Alternative strategies are: educational materials (manuals, videos, talks) and peer support                                                          | N/A                                                                                                        | N/A                                               | This is important. The challenge would be funding resources, especially in low and middle income countries. | N/A                                                   | N/A                                 | N/A |

|                       |      |                                                                                                                                                        |                                                                   |                                                                                                        |                                                                                         |                                                                                             |      |      |
|-----------------------|------|--------------------------------------------------------------------------------------------------------------------------------------------------------|-------------------------------------------------------------------|--------------------------------------------------------------------------------------------------------|-----------------------------------------------------------------------------------------|---------------------------------------------------------------------------------------------|------|------|
|                       |      | of elderly people who have already fallen at home for risk factors that were not addressed                                                             |                                                                   |                                                                                                        |                                                                                         |                                                                                             |      |      |
| <b>Social support</b> | N\ a | Resources availability are a challenge for this item. Personnel should be trained to use comprehensive management plans with frail elderly individuals | N\ A                                                              | Interpersonal relationships are of great importance not only for the quality of life but also survival | Provision of support would be different in each country depending on the care resources | This is an important area. It is a more general recommendation than only related to frailty | N\ A | N\ A |
| <b>Oral health</b>    | N\ a | With appropriate services in place and awareness, this is                                                                                              | It is necessary to develop the simple and standardized tool to be | Oral care is of fundamental importance to preserve the capacity                                        | Limited evidence, but very important. Collaboration with                                | N\ A                                                                                        | N\ A | N\ A |

|                                        |     |                                                                                                                                              |                                                              |                                                                                                                                                                                                 |                                                                  |                                                                           |                                                        |     |     |
|----------------------------------------|-----|----------------------------------------------------------------------------------------------------------------------------------------------|--------------------------------------------------------------|-------------------------------------------------------------------------------------------------------------------------------------------------------------------------------------------------|------------------------------------------------------------------|---------------------------------------------------------------------------|--------------------------------------------------------|-----|-----|
|                                        |     | possible. Inappropriate oral health impacts on chewing and nutrition, requiring modified consistency diets and supplementation in some cases | used to guide the importance of oral health in older adults. | for adequate nutrition                                                                                                                                                                          | dentists and dental hygienists is important in primary care      |                                                                           |                                                        |     |     |
| <b>Urinary incontinence management</b> | N\A | Appropriate services should be in place as well as elderly peoples' awareness about the importance of this item                              | N\A                                                          | Incontinence can lead to a number of complications, both physically and behaviorally. Especially skin irritations, skin infections, urinary tract infections. Incontinence can also lead to the | Should be recommended and more evidence needs to be established. | These recommendations may require greater rigor, benefit/risk assessment. | This is an important area and is broader than frailty. | N\A | N\A |

---

reduction of  
active life  
and  
relationships  
, reduction  
of physical  
activity,  
social  
occasions,  
travels.  
Anxiety and  
depression  
can be  
associated  
with  
incontinence

---
