# Supplementary figures and images for: Frailty recommendations and guidelines: an evaluation of the implementability and a critical appraisal of clinical applicability by the ISPRM Frailty Focus Group
Source: PubMed Central journal article supplement — Eur J Phys Rehabil Med. 2024 Apr 24;60(3):530–9. doi: 10.23736/S1973-9087.24.08486-7 (PMC11258911; doi:10.23736/s1973-9087.24.08486-7), 2024-04-24

## SUPPLEMENTARY DIGITAL MATERIAL 5

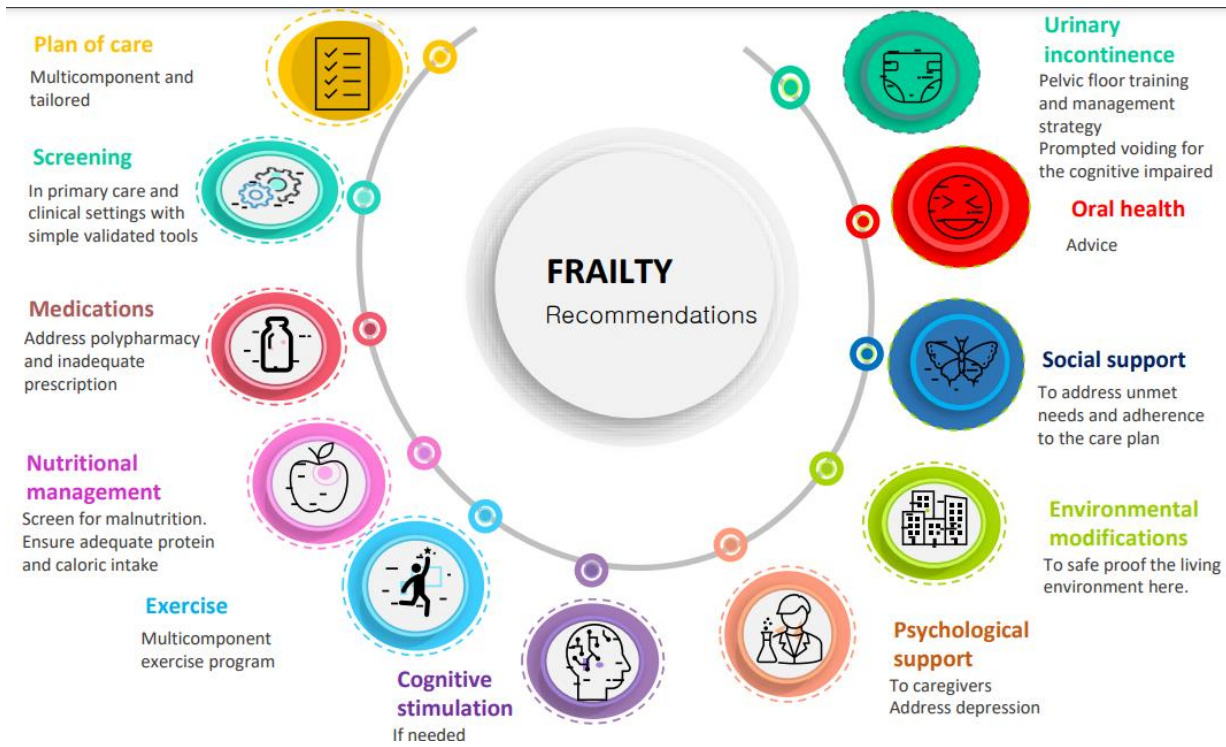

Supplementary Figure 1.—Infographic.

Supplement: Supplementary_Digital_Material5.pdf [file Supplementary_Digital_Material5.pdf]
